# Supplementary material for: Computational screening toward transition metal doped vanadium carbides in different crystal planes for efficient hydrogen evolution: a first-principles study
Source: Royal Society of Chemistry journal article supplement (doi:10.1039/d2cp05207e), 2022-12-30
Supplement: d2cp05207e1.pdf [file d2cp05207e1.pdf]

# Computational Screening toward Transition Metal Doped VC in Different Crystal Planes for Efficient Hydrogen Evolution: A First-Principles Study

Yu Zhang<sup>a</sup>, Bo Zhang<sup>a</sup>, Likai Tong<sup>a</sup>, Junjie Xing<sup>a</sup>, Xiuli Fu<sup>a,\*</sup>

<sup>a</sup> School of Integrated Circuits, Beijing University of Posts and Telecommunications, Beijing 100876, P.R.

China

\* Corresponding author. xiulifu@bupt.edu.cn (X. L Fu)

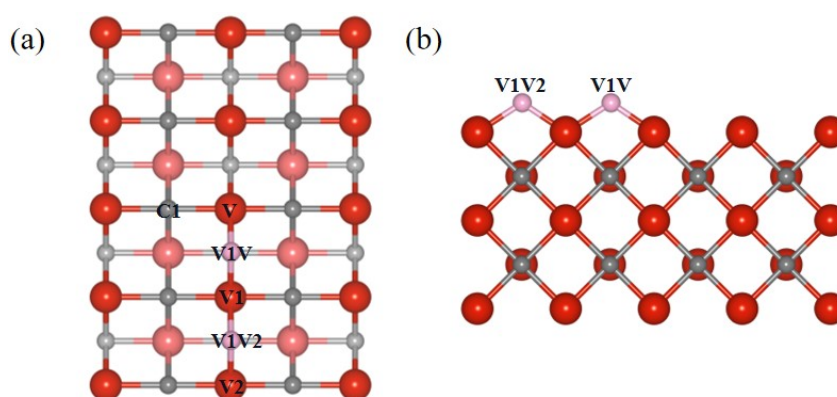

**Fig. S1** The location of the bridge-active sites on the VC(110) model. (a) Top view. (b) Side view. The red, grey, and pink balls in the ball-stick models indicated V, C, and H atoms.

**Tab. S1** The values of ZPE,  $\Delta ZPE$ ,  $\Delta E_{H^*}$ , and  $\Delta G_{H^*}$  of hydrogen atoms at the different adsorption sites of TM-VC (100).

| (100)         | ZPE1     | ZPE2     | ZPE3    | $\Delta ZPE$ | $\Delta E_{H^*}$ | $\Delta G_{H^*}$ |
|---------------|----------|----------|---------|--------------|------------------|------------------|
| VC C site     | 340.4228 | 27.4093  | 25.5601 | 0.1967       | -0.0811          | 0.1801           |
| VC V site     | 321.5908 | 62.1226  | 0       | 0.1919       | 0.5448           | 0.8012           |
| Co-VC Co site | 326.0123 | 71.4440  | 0       | 0.1987       | 0.438            | 0.7012           |
| Co-VC V site  | 200.8555 | 56.2845  | 54.8995 | 0.1560       | 0.5913           | 0.8118           |
| Co-VC C site  | 347.0149 | 57.1230  | 38.9784 | 0.2216       | -0.5371          | -0.2510          |
| Fe-VC Fe site | 240.1155 | 70.1219  | 61.3435 | 0.1858       | 0.4033           | 0.6536           |
| Fe-VC V site  | 205.4249 | 82.9177  | 0       | 0.1442       | 0.5910           | 0.7997           |
| Fe-VC C site  | 355.9924 | 28.2529  | 0       | 1.1921       | -0.3053          | -0.0487          |
| Ni-VC Ni site | 249.1690 | 112.0342 | 63.1592 | 0.2122       | 0.7583           | 1.0349           |
| Ni-VC V site  | 338.1450 | 57.9366  | 0       | 0.1980       | 0.6216           | 0.8842           |
| Ni-VC C site  | 345.3871 | 61.0862  | 40.7997 | 0.2236       | -0.4577          | -0.1695          |
| Mn-VC Mn site | 226.3255 | 70.2720  | 69.8436 | 0.1832       | 0.3813           | 0.6290           |
| Mn-VC V site  | 249.3710 | 95.3077  | 0       | 0.1723       | 0.5872           | 0.8240           |
| Mn-VC C site  | 342.7514 | 56.7085  | 28.8076 | 0.2141       | -0.2775          | 0.0012           |
| Mo-VC Mo site | 240.8132 | 84.4082  | 0       | 0.1626       | 0.2779           | 0.5050           |
| Mo-VC V site  | 230.9060 | 64.3921  | 0       | 0.1476       | 0.5317           | 0.7439           |
| Mo-VC C site  | 350.2801 | 29.0889  | 0       | 0.1897       | -0.1410          | 0.1132           |

**Tab. S2** The values of ZPE,  $\Delta$ ZPE,  $\Delta E_{H^*}$ , and  $\Delta G_{H^*}$  of hydrogen atoms at the different adsorption sites of TM-VC (110).

| (110)                                           | ZPE1     | ZPE2     | ZPE3    | $\Delta$ ZPE | $\Delta E_{H^*}$ | $\Delta G_{H^*}$ |
|-------------------------------------------------|----------|----------|---------|--------------|------------------|------------------|
| VC bridge V <sub>1</sub> V site                 | 150.3009 | 146.9175 | 57.0462 | 0.1771       | -0.3367          | -0.0950          |
| VC C site                                       | 348.8280 | 77.2670  | 46.1616 | 0.2361       | -1.0526          | -0.7519          |
| VC V site                                       | 198.8634 | 16.1405  | 0       | 0.1075       | 0.2559           | 0.4279           |
| Co-VC C site                                    | 364.2330 | 90.9773  | 76.8920 | 0.2661       | -1.2899          | -0.9593          |
| Co-VC Co site                                   | 230.8826 | 56.6804  | 0       | 0.1438       | -0.0917          | 0.1166           |
| Co-VC bridge V <sub>1</sub> V <sub>2</sub> site | 153.5855 | 139.4671 | 59.9405 | 0.1765       | -0.2722          | -0.0312          |
| Co-VC V site                                    | 201.1082 | 39.5432  | 0       | 0.1203       | 0.2587           | 0.4435           |
| Co-VC bridge V <sub>1</sub> Co site             | 186.9527 | 85.5654  | 0       | 0.1363       | -0.1861          | 0.0146           |
| Fe-VC C site                                    | 354.3472 | 76.2572  | 65.4422 | 0.2480       | -1.2516          | -0.9391          |
| Fe-VC Fe site                                   | 228.6672 | 63.5080  | 0       | 0.1461       | -0.1740          | 0.0366           |
| Fe-VC bridge V <sub>1</sub> V <sub>2</sub> site | 151.4732 | 141.7359 | 60.5419 | 0.1769       | -0.2807          | -0.0393          |
| Fe-VC V site                                    | 199.3281 | 37.9594  | 0       | 0.1186       | 0.2550           | 0.4381           |
| Fe-VC bridge V <sub>1</sub> Fe site             | 182.6690 | 89.9685  | 70.7778 | 0.1717       | -0.2571          | -0.0209          |
| Ni-VC C site                                    | 361.7385 | 77.3231  | 0       | 0.2195       | -1.2773          | -0.9932          |
| Ni-VC Ni site                                   | 229.8686 | 36.9447  | 0       | 0.1334       | 0.1656           | 0.3635           |
| Ni-VC bridge V <sub>1</sub> V <sub>2</sub> site | 171.8235 | 151.6687 | 0       | 0.1617       | -0.2478          | -0.0215          |
| Ni-VC V site                                    | 276.5147 | 0        | 0       | 0.1383       | 0.2757           | 0.4785           |
| Ni-VC bridge V <sub>1</sub> Ni site             | 166.8327 | 97.5119  | 63.2317 | 0.1638       | -0.0140          | 0.2142           |
| Mn-VC C site                                    | 352.1259 | 77.3882  | 65.2584 | 0.2474       | -1.2095          | -0.8977          |
| Mn-VC Mn site                                   | 231.1138 | 0        | 0       | 0.1156       | -0.0718          | 0.1083           |
| Mn-VC bridge V <sub>1</sub> V <sub>2</sub> site | 149.8111 | 141.5312 | 61.4604 | 0.1764       | -0.2985          | -0.0576          |
| Mn-VC V site                                    | 199.5333 | 37.0897  | 0       | 0.1183       | 0.2564           | 0.4392           |
| Mn-VC bridge V <sub>1</sub> Mn site             | 160.8185 | 119.6245 | 67.3553 | 0.1739       | -0.2566          | -0.0182          |
| Mo-VC C site                                    | 338.9793 | 74.0891  | 60.9111 | 0.2370       | -0.9529          | -0.6514          |
| Mo-VC Mo site                                   | 209.8593 | 60.7097  | 0       | 0.1353       | 0.0112           | 0.2110           |
| Mo-VC bridge V <sub>1</sub> V <sub>2</sub> site | 147.8526 | 145.8331 | 60.1527 | 0.1769       | -0.3287          | -0.0873          |
| Mo-VC V site                                    | 199.0872 | 21.3336  | 0       | 0.1102       | 0.2530           | 0.4277           |
| Mo-VC bridge V <sub>1</sub> Mo site             | 155.0415 | 139.1191 | 62.3088 | 0.1782       | -0.3974          | -0.1546          |

**Tab. S3** The values of ZPE,  $\Delta$ ZPE,  $\Delta E_{H^*}$ , and  $\Delta G_{H^*}$  of hydrogen atoms at the different adsorption sites of TM-VC (111).

| (111)         | ZPE1     | ZPE2    | ZPE3    | $\Delta$ ZPE | $\Delta E_{H^*}$ | $\Delta G_{H^*}$ |
|---------------|----------|---------|---------|--------------|------------------|------------------|
| VC V site     | 192.6112 | 41.6851 | 0       | 0.1171       | -0.0564          | 0.1253           |
| VC C site     | 148.1868 | 85.8038 | 52.4867 | 0.1432       | -0.9053          | -0.6976          |
| Co-VC Co site | 228.0789 | 22.3464 | 0       | 0.1252       | -0.4289          | -0.2392          |
| Co-VC C site  | 158.0140 | 49.3818 | 0       | 0.1037       | -0.5108          | -0.3426          |
| Co-VC V site  | 192.7189 | 19.6462 | 0       | 0.1062       | -0.0906          | 0.0801           |
| Fe-VC Fe site | 225.3897 | 24.4790 | 22.5929 | 0.1362       | -0.5234          | -0.3226          |
| Fe-VC C site  | 136.9755 | 78.4136 | 50.4681 | 0.1329       | -0.5679          | -0.3705          |
| Fe-VC V site  | 191.2509 | 0       | 0       | 0.0956       | -0.0771          | 0.0830           |
| Ni-VC Ni site | 225.4188 | 0       | 0       | 0.1127       | -0.1383          | 0.0389           |
| Ni-VC V site  | 187.3990 | 0       | 0       | 0.0937       | -0.0944          | 0.0638           |
| Mn-VC Mn site | 220.7717 | 35.4944 | 27.4304 | 0.1418       | -0.4186          | -0.2123          |
| Mn-VC C site  | 151.8739 | 73.6433 | 0       | 0.1127       | -0.6637          | -0.4864          |
| Mn-VC V site  | 190.6365 | 54.5928 | 0       | 0.1226       | -0.0691          | 0.1180           |
| Mo-VC Mo site | 211.3261 | 41.4017 | 20.4216 | 0.1366       | -0.3415          | -0.1404          |
| Mo-VC V site  | 190.2645 | 0       | 0       | 0.0951       | -0.0184          | 0.1412           |
| Mo-VC C site  | 140.9009 | 89.4241 | 76.8064 | 0.1536       | -0.9365          | -0.7184          |
